# Supplementary material
Source: PubMed Central journal article supplement (PMC4300424)
Supplement: 268_2014_2774_MOESM1_ESM.pdf [file 268_2014_2774_MOESM1_ESM.pdf]

# ASiT Survey: Mentoring in Surgery

## 2. About you

**\*1. What is your gender?**

- Male
- Female

**\*2. How old are you?**

**\*3. Year of qualification from medical school?**

**\*4. From which country did you obtain your primary medical qualification?**

- United Kingdom
- Republic of Ireland
- Other (please specify)

**\*5. Are you a military trainee (e.g. registered with the Defence Postgraduate Medical Deanery)?**

- Yes
- No

**\*6. Are you in "less than full time" training?**

- Yes
- No

**\*7. Do you currently hold an academic post (ACF, Clinical Lecturer, etc)?**

- Yes
- No

## ASiT Survey: Mentoring in Surgery

### \*8. What is your current grade?

- FY 1
- FY 2
- CT 1 / ST 1 / SHO 1
- CT 2 / ST 2 / SHO 2
- CT 3 / SHO 3+
- SpR 1 / StR 3
- SpR 2 / StR 4
- SpR 3 / StR 5
- SpR 4 / StR 6
- SpR 5 / StR 7
- SpR 6 / StR 8
- Post-CCT
- Research Fellow
- Clinical Fellow
- Non-training grade

Other (please specify)

### \*9. In which surgical speciality do you currently work / have a training number?

- Cardiothoracic surgery
- General Surgery (excluding vascular)
- ENT
- Neurosurgery
- OMFS
- Paediatric Surgery
- Plastic Surgery
- Trauma and Orthopaedics
- Urology
- Vascular surgery
- Not currently working in a surgical post

## ASiT Survey: Mentoring in Surgery

**10. If you selected general surgery, please indicate your MAIN sub-specialty preference:  
NB. Vascular surgery is now an independent specialty, see Q8.**

- Breast
- Colorectal
- Endocrine
- Transplant
- Upper-gastrointestinal (inc HPB)

**11. If you selected a specialty other than General Surgery do you have a specific sub-specialty interest?**

**\*12. Which Deanery do you work in?**

- East Midlands (Trent & Leicester)
- East of England
- KSS
- London
- Mersey
- North West
- Northern
- Northern Ireland
- Oxford Deanery
- Peninsula / South West
- Scotland - East
- Scotland - North
- Scotland - Southeast
- Scotland - West
- Severn
- Wales
- Wessex
- West Midlands
- Yorkshire & Humber
- Other (incl Republic of Ireland) - Please specify

## ASiT Survey: Mentoring in Surgery

### \*13. In what type of hospital do you currently work?

- District General Hospital
- Teaching hospital
- Specialist Centre (specialty or disease based)

## 3. Mentoring in surgery

Q. What do we mean by 'mentoring'?

A. Mentoring has been defined as 'a relationship between two people in which trust and respect enables problems and difficulties to be discussed in an open and supportive environment' (Whittaker & Cartwright, 2000).

**\*14. Within surgery, do you currently have someone you would consider to be a mentor?**

Yes

No

# ASiT Survey: Mentoring in Surgery

## 4. Your Current Mentor

Please answer these questions about the mentoring you currently receive.

### \*15. How many mentors do you have?

- One
- Two
- Three
- Other (please specify)

### 16. Does your mentor have any other professional role for you?

(Tick all that apply)

- Your educational supervisor
- Your current consultant
- Non-consultant senior (e.g. your SpR)
- Your training programme director
- Other (please specify)

### \*17. How long has this mentoring relationship existed?

- 1 - 3 months
- 3 - 6 months
- 6 - 12 months
- 1 - 2 years
- 3 - 4 years
- 5 - 6 years
- 7 + years

### \*18. Are they in the same surgical specialty as you? (e.g. ENT, orthopaedics, neurosurgery, etc)

- Yes
- No

### \*19. Are they based in the same hospital as you?

- No
- Yes

## ASiT Survey: Mentoring in Surgery

**\*20. Are they based in the same training region as you?**

- No
- Yes

**\*21. What type of mentoring do they provide for you?**

**(Tick all that apply)**

- Clinical and professional matters
- Pastoral non-clinical / non-work matters

**\*22. What format does this mentoring take?**

- Formal: Arranged, required or documented mentoring
- Informal: Ad-hoc or undocumented mentoring
- Both formats

**\*23. How often do you meet your mentor?**

- Daily
- Weekly
- Monthly
- Bi-monthly
- Less often
- Ad-hoc

**\*24. Through what format(s) does this mentoring most commonly take place?**

- Telephone
- Email
- Face-to-face
- Audio / teleconference (e.g. Skype)
- SMS / instant messaging
- Other (please specify)

**25. If you have more than one mentor, do different people provide different mentoring roles (e.g. pastoral vs. clinical)?**

- No
- Yes
- Not applicable

# ASiT Survey: Mentoring in Surgery

## \*26. How has the mentoring you have received influenced you personally and professionally?

|                       | Strongly negative     | Negative              | Neutral               | Positive              | Strongly positive     | N/A                   |
|-----------------------|-----------------------|-----------------------|-----------------------|-----------------------|-----------------------|-----------------------|
| Personal life         | <input type="radio"/> |
| Exam performance      | <input type="radio"/> |
| Working relationships | <input type="radio"/> |
| Clinical confidence   | <input type="radio"/> |
| Career progression    | <input type="radio"/> |
| Clinical skill        | <input type="radio"/> |

## \*27. Please rate the overall usefulness of the mentoring you are receiving:

|                         | Strongly negative     | Negative              | Neutral               | Positive              | Strongly positive     |
|-------------------------|-----------------------|-----------------------|-----------------------|-----------------------|-----------------------|
| Usefulness of mentoring | <input type="radio"/> |

## 28. Do you have any PROBLEMS with your current mentoring?

## 29. Do you have any other comments about your current mentoring?



## 5. Mentoring in surgery

You do not currently have a mentor. Please answer these questions for your current surgical experiences.

### \*30. Would you like a clinical mentor?

- Yes
- No
- Don't know

### \*31. Would you like a pastoral mentor?

- No
- Yes
- Don't know

### \*32. How important would it be to have a mentor in your surgical training?

Doesn't Slightly Very  
matter Important important N/A

Importance =

## 6. Ideal Mentoring Programme

The following questions relate to your IDEAL mentoring relationship:

### \*33. Ideally, in which areas would you particularly like mentoring? (Tick all that apply)

- Clinical skill
- Working relationships
- Exam performance
- Career progression
- Personal life
- Clinical confidence
- Academic / research work

Other (please specify)

### \*34. How important to you are the following attributes of your ideal mentor?

|                                       | DO NOT want           | Doesn't matter        | DO want               |
|---------------------------------------|-----------------------|-----------------------|-----------------------|
| Works in same clinical team           | <input type="radio"/> | <input type="radio"/> | <input type="radio"/> |
| Works in same hospital                | <input type="radio"/> | <input type="radio"/> | <input type="radio"/> |
| Works in same region                  | <input type="radio"/> | <input type="radio"/> | <input type="radio"/> |
| Works in same surgical specialty      | <input type="radio"/> | <input type="radio"/> | <input type="radio"/> |
| Has received mentoring training       | <input type="radio"/> | <input type="radio"/> | <input type="radio"/> |
| Maintains confidentiality             | <input type="radio"/> | <input type="radio"/> | <input type="radio"/> |
| Is the same ethnicity and/or religion | <input type="radio"/> | <input type="radio"/> | <input type="radio"/> |
| Is the same gender as you             | <input type="radio"/> | <input type="radio"/> | <input type="radio"/> |
| Is a clinical academic                | <input type="radio"/> | <input type="radio"/> | <input type="radio"/> |
| Is a similar generation to you        | <input type="radio"/> | <input type="radio"/> | <input type="radio"/> |
| Is also your educational supervisor   | <input type="radio"/> | <input type="radio"/> | <input type="radio"/> |
| Someone who is allocated to you       | <input type="radio"/> | <input type="radio"/> | <input type="radio"/> |
| Someone who is chosen by you          | <input type="radio"/> | <input type="radio"/> | <input type="radio"/> |

### 35. What other personal attributes would your ideal mentor have?

## ASiT Survey: Mentoring in Surgery

**\*36. Ideally, through what format would your mentoring most frequently take place?**

**(Tick all that apply)**

- Audio / teleconference (e.g. Skype)
- Telephone
- Face-to-face
- Email
- SMS / instant messaging
- Other (please specify)

**\*37. Ideally, would your mentoring be:**

- Informal, undocumented mentoring sessions
- Formal, documented mentoring sessions
- No preference

**\*38. Ideally, what grade of mentor would you most prefer?**

- Consultant
- Registrar
- SHO / Core Trainee

**\*39. Ideally, how long would this mentoring relationship exist?**

- During current post
- During training (until Consultancy)
- For a specific period
- Lifelong (into Consultancy)
- No preference

## 7. Acting as a mentor

**\*40. Have you ever acted as a mentor?**

- No
- Yes

**\*41. Have you had formal mentoring training?**

- No
- Yes

**\*42. Would you like mentoring training (or further training if you have already received some previously)?**

- No
- Yes

**\*43. Would you be willing to act as a mentor to other trainees while you are still a trainee yourself?**

- No
- Yes

## 8. Mentoring others

**\*44. If you acted as a mentor, how often would you prefer to meet?**

- Daily
- Weekly
- Monthly
- Bi-monthly
- Less often
- Ad-hoc
- No preference

**\*45. How would you prefer to mentor?**

- Prepared to travel to meet face-to-face
- Prefer other means (e.g. telephone, email, online, etc)

**\*46. What grade of trainee would you prefer to mentor? (Tick all that apply)**

- Registrar
- SHO / Core Trainee
- HO / Foundation Year
- Medical student

**\*47. What type of mentoring would you be prepared to offer:**

- Formal, documented mentoring sessions
- Informal, undocumented mentoring sessions
- No preference
